# Supplementary material for: A facile turn-on luminescence technique to trap hydrazine and its application in button mushroom (Agaricus bisporus)
Source: Royal Society of Chemistry journal article supplement (doi:10.1039/d3nj00504f), 2023-01-01
Supplement: d3nj00504f1.pdf [file d3nj00504f1.pdf]

## Supporting Information

### **A facile turn-on luminescence technique to trap hydrazine and its application in button mushroom (*Agaricus bisporus*)**

Priyotosh Ghosh,<sup>a</sup> Koushik Kumar Dey,<sup>b</sup> Ansuman Chattopadhyay<sup>b</sup> and Prithidipa Sahoo\*<sup>a</sup>

<sup>a</sup>Department of Chemistry, Visva-Bharati University, Santiniketan-731235, India.

<sup>b</sup>Department of Zoology, Visva-Bharati University, Santiniketan-731235, India.

| <b>CONTENT</b>                                                        | <b>Page no.</b> |
|-----------------------------------------------------------------------|-----------------|
| <b>1. NMR spectra.....</b>                                            | <b>2-5</b>      |
| <b>2. Selectivity Experiment.....</b>                                 | <b>6</b>        |
| <b>3. Competitive selectivity in presence of other analytes.....</b>  | <b>7</b>        |
| <b>4. UV-vis fluorescence titration.....</b>                          | <b>8</b>        |
| <b>5. Job's plot.....</b>                                             | <b>9</b>        |
| <b>6. Calculation of limit of detection.....</b>                      | <b>10</b>       |
| <b>7. pH titration.....</b>                                           | <b>11</b>       |
| <b>8. DFT study.....</b>                                              | <b>12-13</b>    |
| <b>9. IR Spectroscopy Study.....</b>                                  | <b>14</b>       |
| <b>10. NMR spectra of C2, C3.....</b>                                 | <b>15-16</b>    |
| <b>11. Comparative Fluorescence study of CCF with C2,C3,C4.....</b>   | <b>17-18</b>    |
| <b>12. Quantitative analysis of hydrazine in button mushroom.....</b> | <b>19</b>       |

**<sup>1</sup>H NMR of C1 in DMSO-d<sub>6</sub>:**

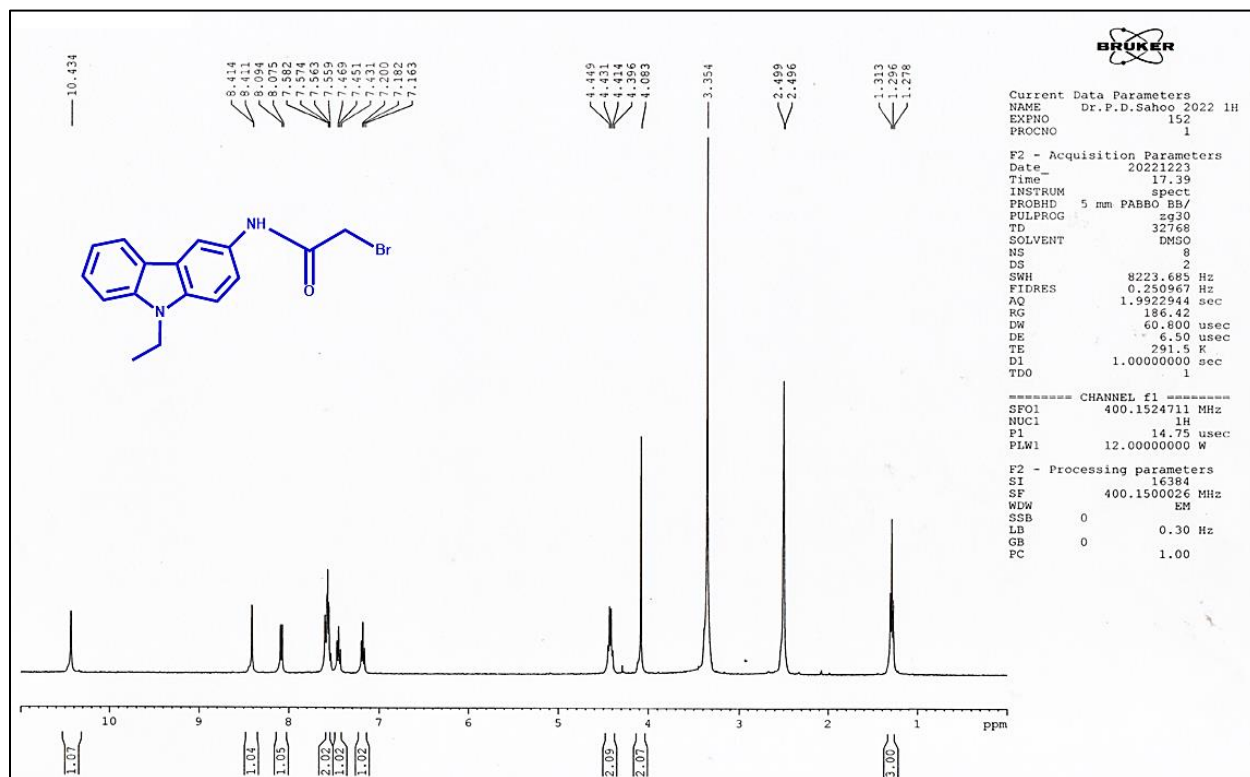

**Figure S1.** <sup>1</sup>H NMR of C1 in DMSO-d<sub>6</sub> (400 MHz).

**$^{13}\text{C}$  NMR of C1 in  $\text{DMSO-d}_6$ :**

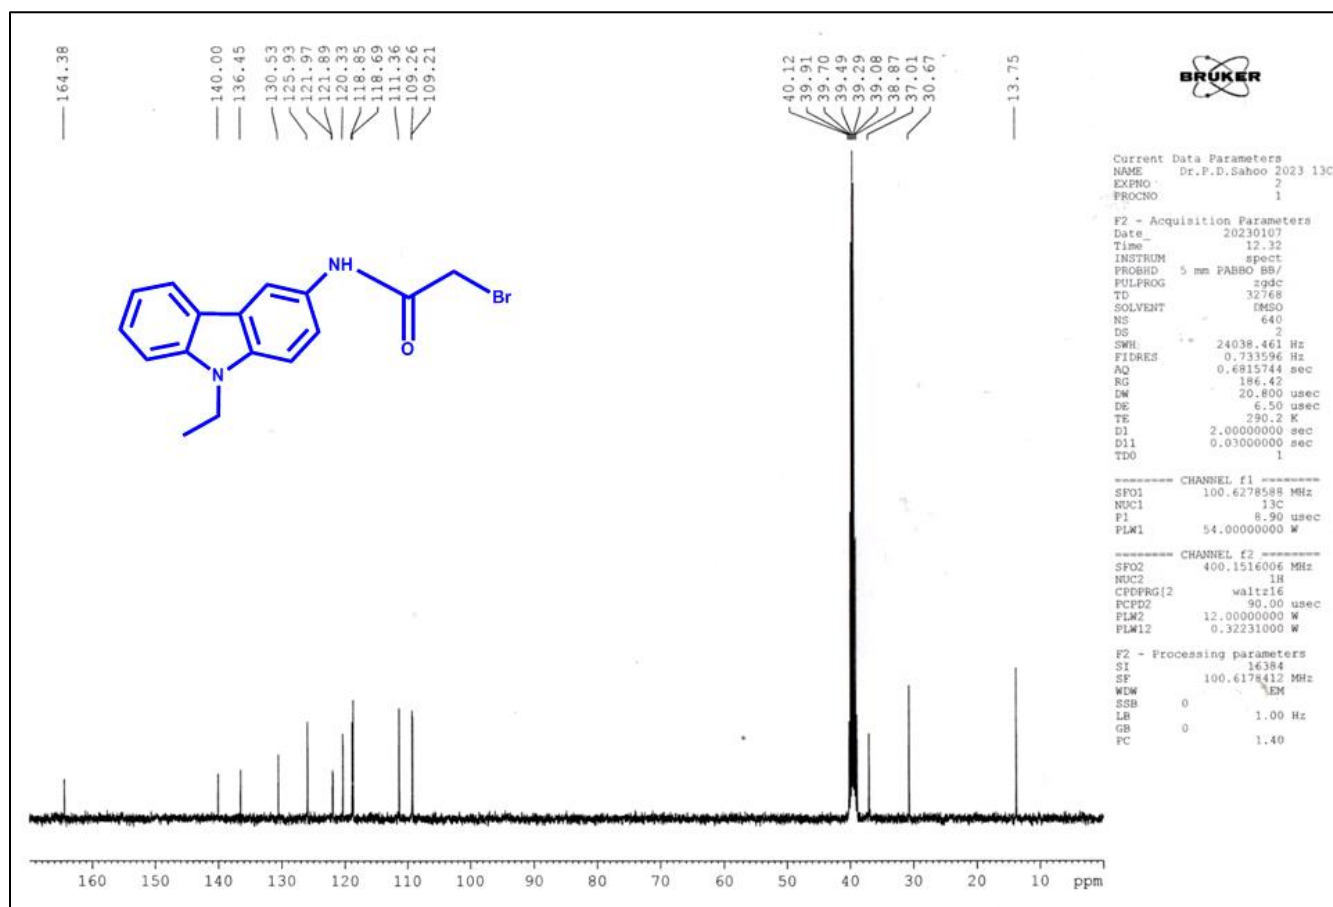

**Figure S2.**  $^{13}\text{C}$  NMR of C1 in  $\text{DMSO-d}_6$  (100 MHz).

**<sup>1</sup>H NMR of CCF in DMSO-d<sub>6</sub>**

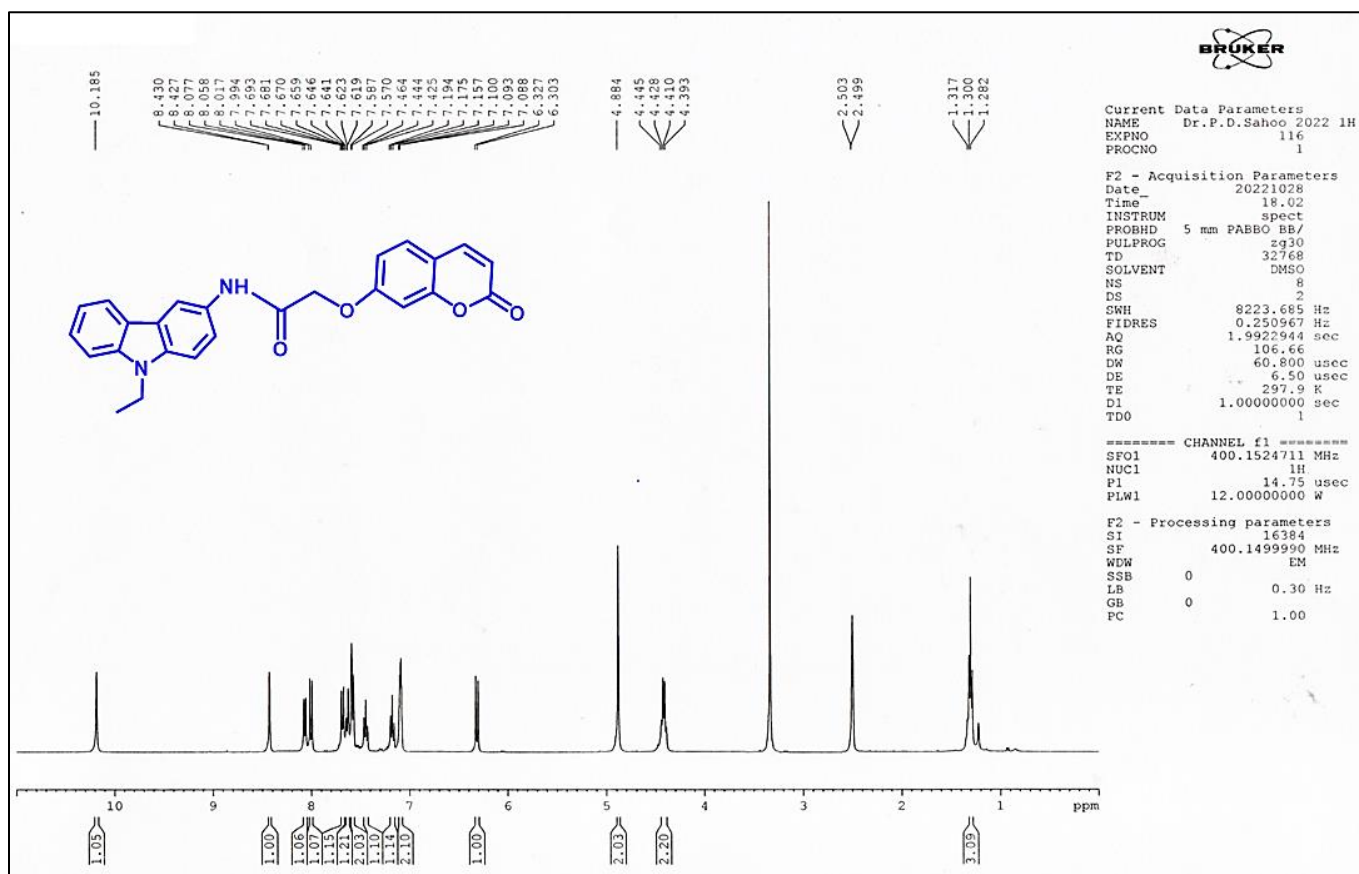

**Figure S3.** <sup>1</sup>H NMR of CCF in DMSO-d<sub>6</sub> (400)

**<sup>13</sup>C NMR of CCF in DMSO-d<sub>6</sub>:**

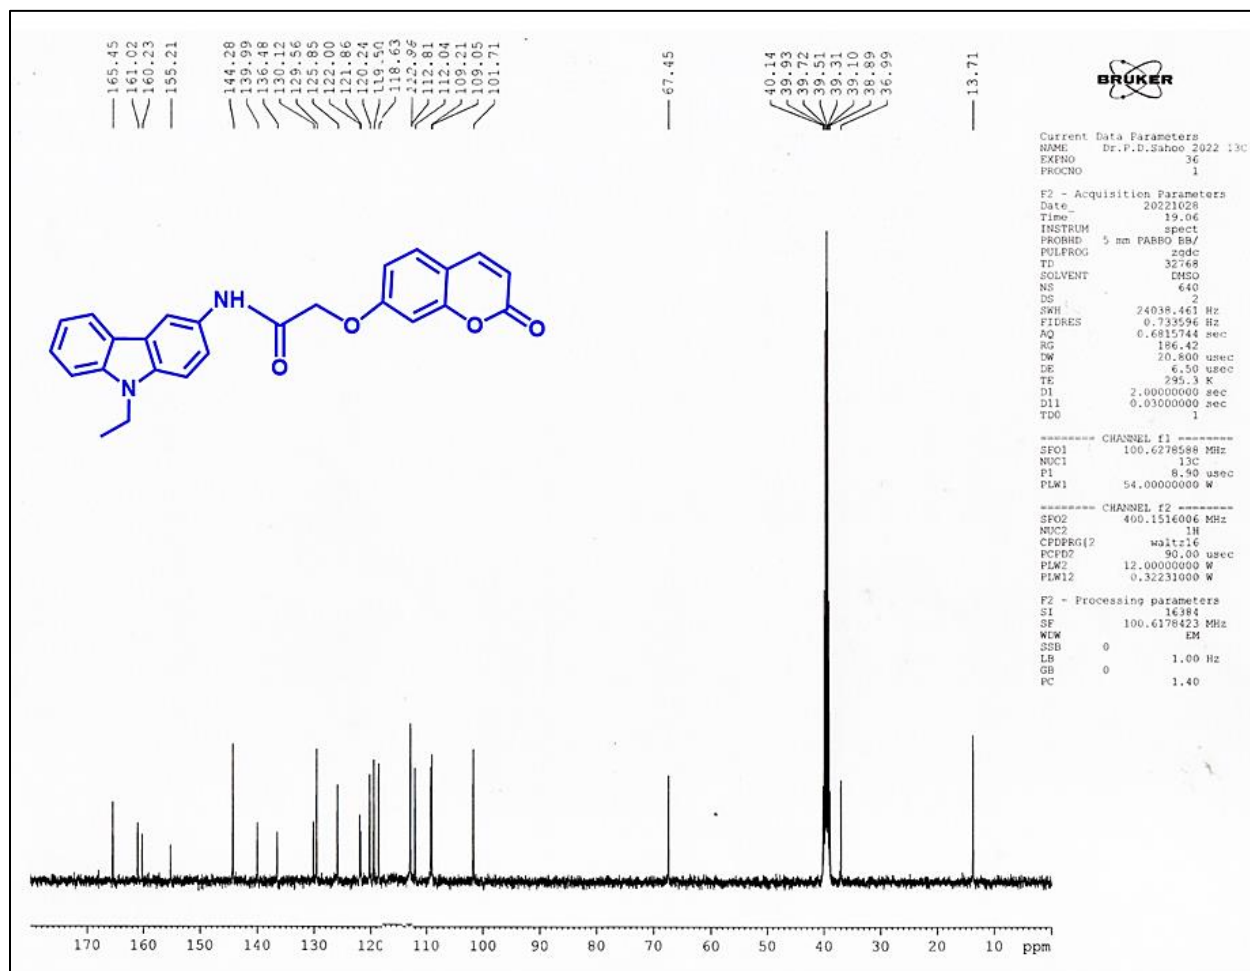

**Figure S4.** <sup>13</sup>C NMR of CCF in DMSO-d<sub>6</sub> (100 MHz).

## 2. Selectivity Experiment

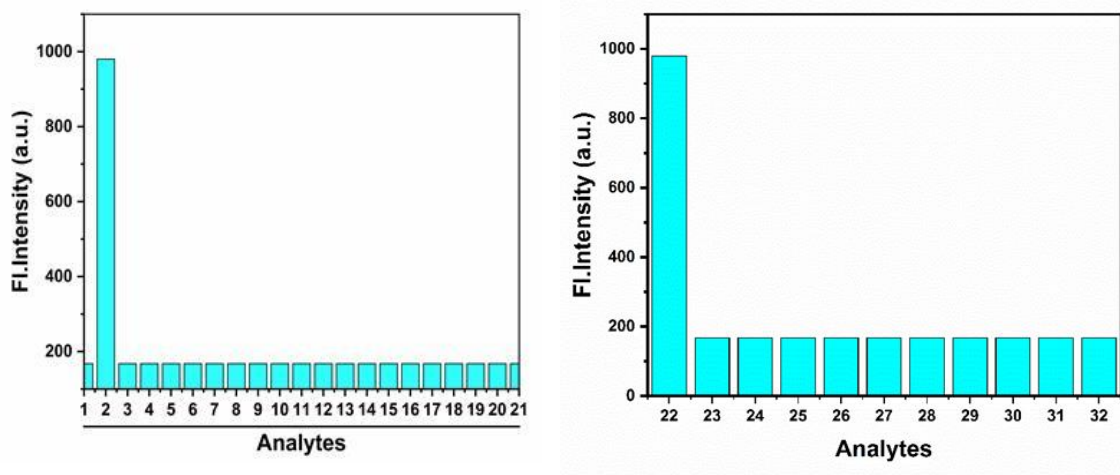

**Figure S5.** Fluorescence spectra of CCF in presence of different analytes at 452 nm ( $\lambda_{ex} = 332$  nm) in  $H_2O-CH_3CN$  (4:1, v/v) at neutral pH. 1) Blank, 2)  $N_2H_4$ , 3)  $Zn^{2+}$ , 4)  $Cu^{2+}$ , 5)  $Pb^{2+}$ , 6)  $Al^{3+}$ , 7)  $OCl^-$ , 8)  $CN^-$ , 9)  $NO_3^-$ , 10)  $H_2PO_4^-$ , 11)  $NH_4OH$ , 12) Pyridine, 13) n-Butylamine and 14) Ethylenediamine, 15) lysine, 16) histidine, 17) aniline, 18) cysteine, 19)  $SCN^-$ , 20)  $H_2O_2$ , 21)  $CH_3NH_2$ , 22)  $N_2H_4$ , 23)  $Cl^-$ , 24)  $F^-$ , 25) alanine, 26) tryptophan, 27) leucine, 28) glycine, 29)  $ClO_4^-$ , 30)  $N_3^-$ , 31)  $NO_3^-$ , 32) arginine.

### 3. Competitive selectivity in presence of other analytes

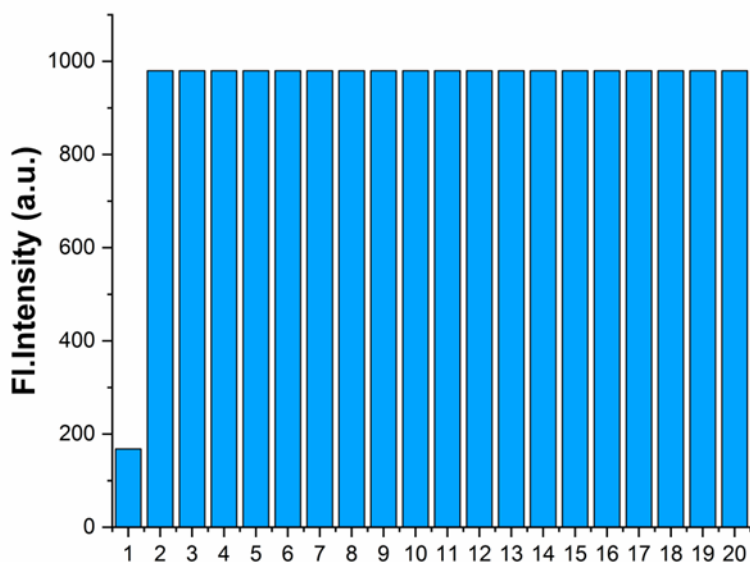

**Figure S6.** Histogram representing competitive fluorescence spectra of CCF+ N<sub>2</sub>H<sub>4</sub> in presence of different analytes at 452 nm ( $\lambda_{ex}$ = 332 nm) in H<sub>2</sub>O-CH<sub>3</sub>CN (4:1, v/v) at neutral pH. [1] Blank, 2) N<sub>2</sub>H<sub>4</sub>, 3) N<sub>2</sub>H<sub>4</sub>+Zn<sup>2+</sup>, 4) N<sub>2</sub>H<sub>4</sub>+Cu<sup>2+</sup>, 5) N<sub>2</sub>H<sub>4</sub>+Pb<sup>2+</sup>, 6) N<sub>2</sub>H<sub>4</sub>+Mg<sup>2+</sup>, 7) N<sub>2</sub>H<sub>4</sub>+Ca<sup>2+</sup>, 8) N<sub>2</sub>H<sub>4</sub>+Na<sup>+</sup>, 9) N<sub>2</sub>H<sub>4</sub>+K<sup>+</sup>, 10) N<sub>2</sub>H<sub>4</sub>+F<sup>-</sup>, 11) N<sub>2</sub>H<sub>4</sub>+Cl<sup>-</sup>, 12) N<sub>2</sub>H<sub>4</sub>+ClO<sub>4</sub><sup>-</sup>, 13) N<sub>2</sub>H<sub>4</sub>+CN<sup>-</sup>, 14) N<sub>2</sub>H<sub>4</sub>+NO<sub>3</sub><sup>-</sup>, 15) N<sub>2</sub>H<sub>4</sub>+H<sub>2</sub>PO<sub>4</sub><sup>-</sup>, 16) N<sub>2</sub>H<sub>4</sub>+N<sub>3</sub><sup>-</sup>, 17) N<sub>2</sub>H<sub>4</sub>+NH<sub>4</sub>OH 18) N<sub>2</sub>H<sub>4</sub>+Pyridine, 19) N<sub>2</sub>H<sub>4</sub>+n-Butylamine and 20) N<sub>2</sub>H<sub>4</sub>+Ethylenediamine]

## 4. UV-vis and fluorescence titration studies

### UV-vis spectral studies:

A stock solution of **CCF** ( $1 \times 10^{-5}$  M) was prepared in water-acetonitrile (4:1, v/v). **N<sub>2</sub>H<sub>4</sub>** solution of concentration  $1 \times 10^{-4}$  M was prepared in Millipore water. All experiments were carried out in an aqueous medium at neutral pH. During the titration, each time a  $1 \times 10^{-5}$  M solution of **CCF** was filled in a quartz optical cell of 1 cm optical path length and **N<sub>2</sub>H<sub>4</sub>** stock solution was added into the quartz optical cell gradually by using a micropipette.

### Fluorescence spectral studies:

A stock solution of **CCF** ( $1 \times 10^{-5}$  M) was prepared in water-acetonitrile(4:1, v/v). **N<sub>2</sub>H<sub>4</sub>** solution of concentration  $1 \times 10^{-4}$  M was prepared in Millipore water. All experiments were carried out in aqueous medium at neutral pH. During titration, each time a  $1 \times 10^{-5}$  M solution of **CCF** was filled in a quartz optical cell of 1 cm optical path length and **N<sub>2</sub>H<sub>4</sub>** stock solution was added into the quartz optical cell gradually by using a micropipette. For all fluorescence measurements, excitations were provided at 332 nm, and emissions were collected from 350 to 580 nm.



## 5. Job's plot

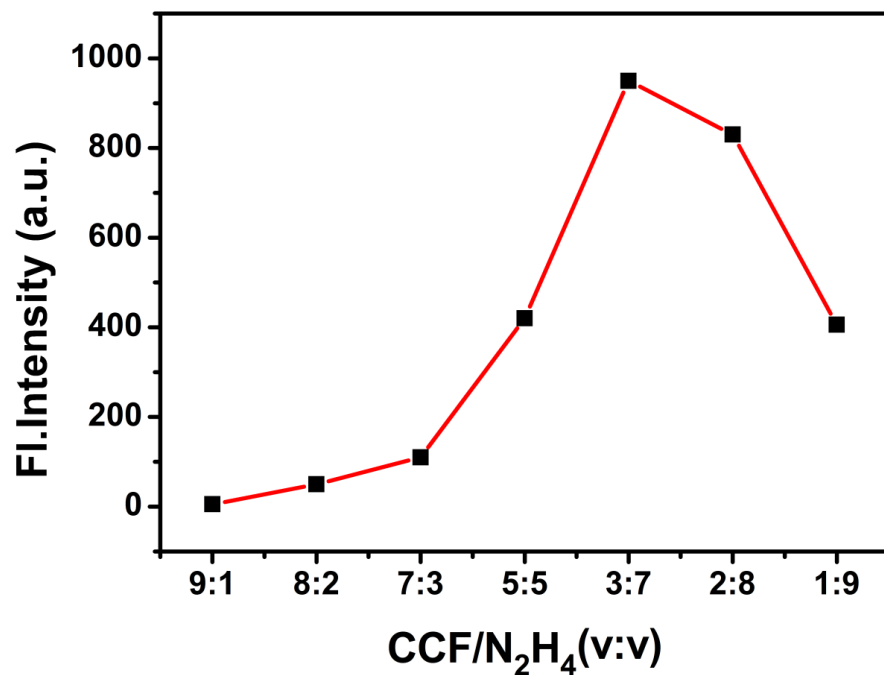

**Figure S7.** Job's plot of CCF (10 $\mu$ M) with N<sub>2</sub>H<sub>4</sub> in acetonitrile-water (1:4, v/v), at neutral pH, by fluorescence method, which indicate 1:2 stoichiometry for CCF with N<sub>2</sub>H<sub>4</sub>. Standard deviations are represented by error bar (n=3).

## 6. Calculation of limit of detection (LOD) of CFC with N<sub>2</sub>H<sub>4</sub>:

The detection limit of the chemosensor **CCF** for **N<sub>2</sub>H<sub>4</sub>** was calculated on the basis of fluorescence titration. To determine the standard deviation for the fluorescence intensity, the emission intensity of four individual receptors without **N<sub>2</sub>H<sub>4</sub>** was measured by 10 times and the standard deviation of blank measurements was calculated.

The limit of detection (LOD) of **CCF** for sensing **N<sub>2</sub>H<sub>4</sub>** was determined from the following equation:

$$\text{LOD} = K \times \text{SD}/S$$

Where  $K = 2$  or  $3$  (we take  $3$  in this case);  $\text{SD}$  is the standard deviation of the blank receptor solution;  $S$  is the slope of the calibration curve.

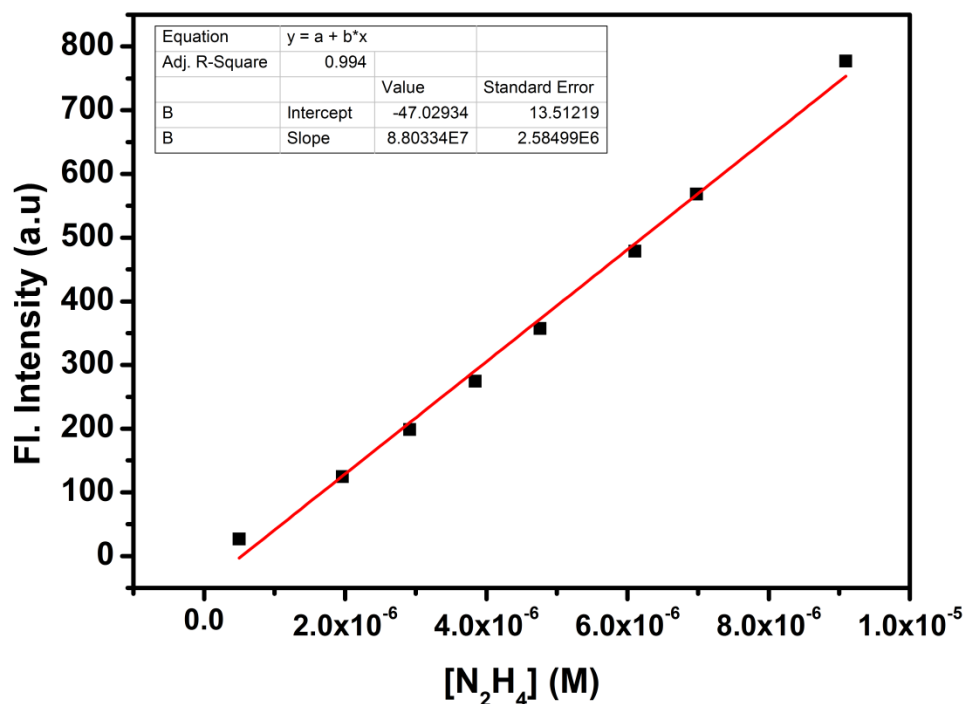

**Figure S8.** Linear fit curve of **CCF** at 452 nm with respect to **N<sub>2</sub>H<sub>4</sub>** concentration

For **CCF** with **N<sub>2</sub>H<sub>4</sub>**:

From the linear fit graph, we get slope =  $8.80334 \times 10^7$ , and  $\text{SD}$  value is 0.3852.

Thus, using the above formula, we get the Limit of Detection =  $1.312 \times 10^{-8}$  M. Therefore **CCF** can detect **N<sub>2</sub>H<sub>4</sub>** up to this very lower concentration by fluorescence technique.

## 7. pH titration study:

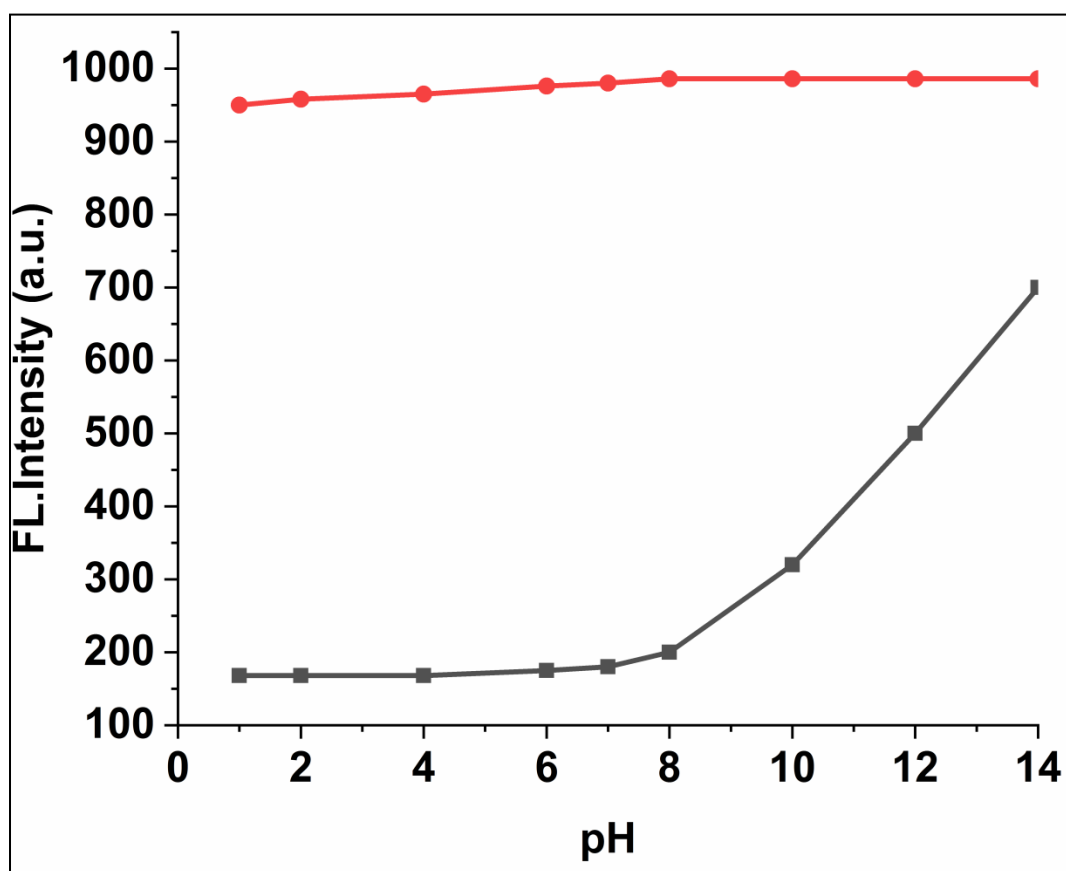

**Figure S9.** Effect of pH on the fluorescence intensity of CCF ( $10^{-5}\text{M}$ ) in the absence of  $\text{N}_2\text{H}_4$  (blackline) and in the presence of  $\text{N}_2\text{H}_4$  ( $10^{-4}\text{M}$ , red line).

## 8. DFT study

**Table S1.** Details of the geometry optimization in Gaussian 09 program

| Details              | CCF      | F1 moiety | F2 moiety |
|----------------------|----------|-----------|-----------|
| Calculation method   | B3LYP    | B3LYP     | B3LYP     |
| Basis set            | 6-31G**  | 6-31G**   | 6-31G**   |
| E(CAM-B3LYP) (a.u.)  | -1375.20 | -651.50   | -947.49   |
| Charge, Multiplicity | 0, 1     | 0, 1      | 0, 1      |
| Solvent (CPCM)       | Water    | Water     | Water     |

## TDDFT- Calculations

**Table S2.** Selected electronic excitation energies (eV), oscillator strengths (f), main configurations of the low-lying excited states of CPLC. The data were calculated by TDDFT//B3LYP/6-31G(d,p) based on the optimized ground state geometries.

| Molecules | Electronic Transition           | Excitation Energy <sup>a</sup> | f <sup>b</sup> | Composition <sup>c</sup> (%) |
|-----------|---------------------------------|--------------------------------|----------------|------------------------------|
| CCF       | S <sub>0</sub> → S <sub>4</sub> | 4.0781eV304.03 nm              | 0.5287         | H -2→ L (68.7%)              |

<sup>a</sup>Only selected excited states were considered. The numbers in parentheses are the excitation energy in wavelength. <sup>b</sup>Oscillator strength. <sup>c</sup>H stands for HOMO and L stands for LUMO.

**Top view of energy optimized geometry:**

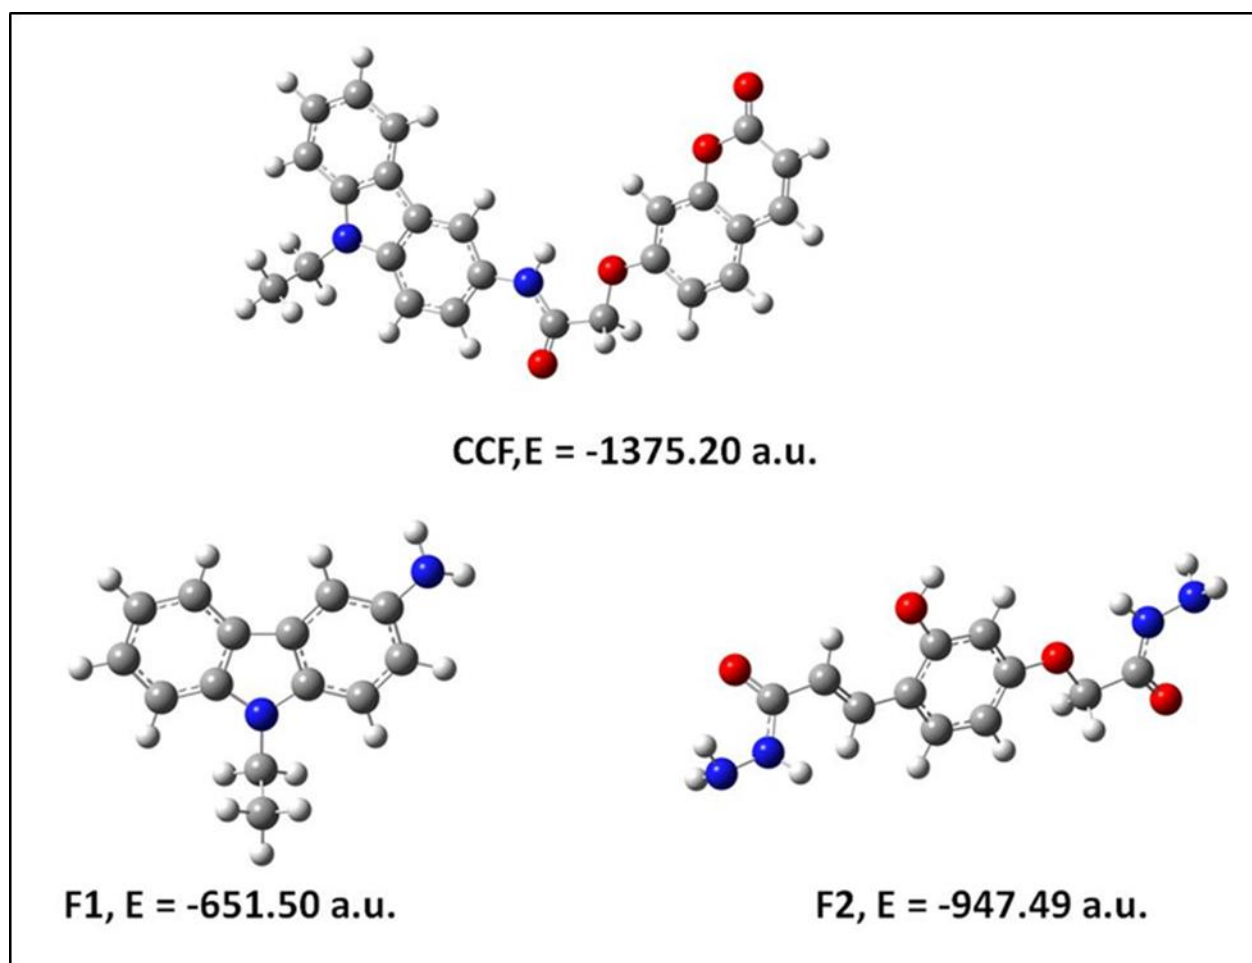

**Figure S10.** Optimized structures of CCF, F1 and F2 moiety with their corresponding energies.

## 9. IR Spectroscopy Study

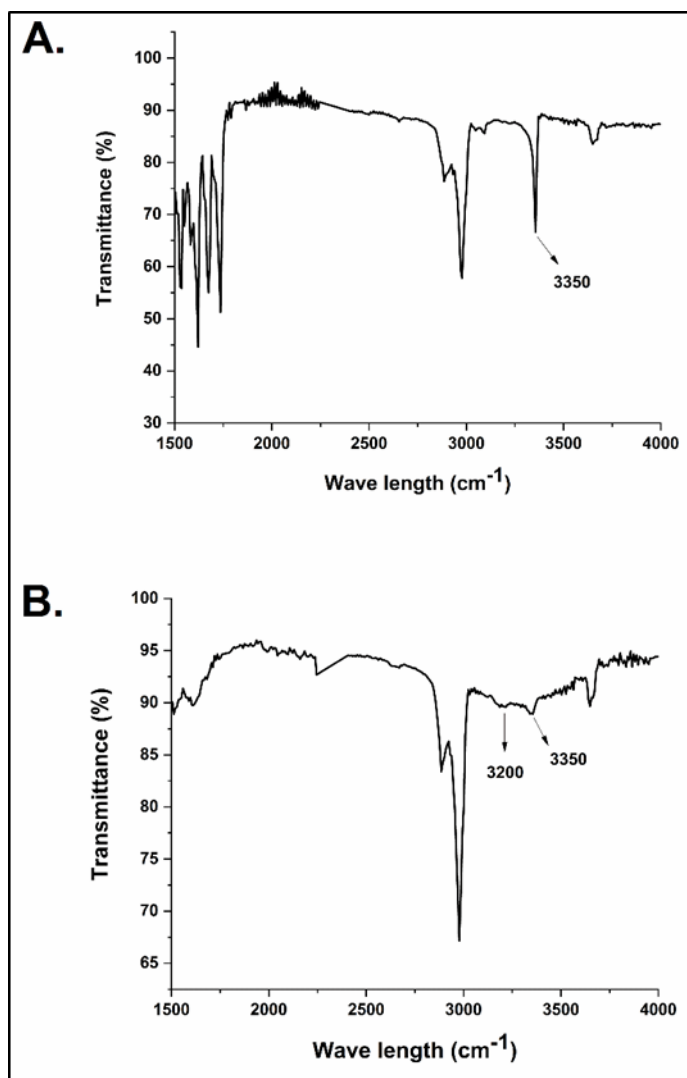

**Figure S11.** (A) IR spectrum of CCF and (B) IR spectrum of CCF + N<sub>2</sub>H<sub>4</sub>, 3350 cm<sup>-1</sup> and 3200 cm<sup>-1</sup> indicates amide and O-H bond respectively.

## 10. NMR spectra of C2, C3

$^1\text{H}$  NMR of C2 in DMSO- $d_6$ :

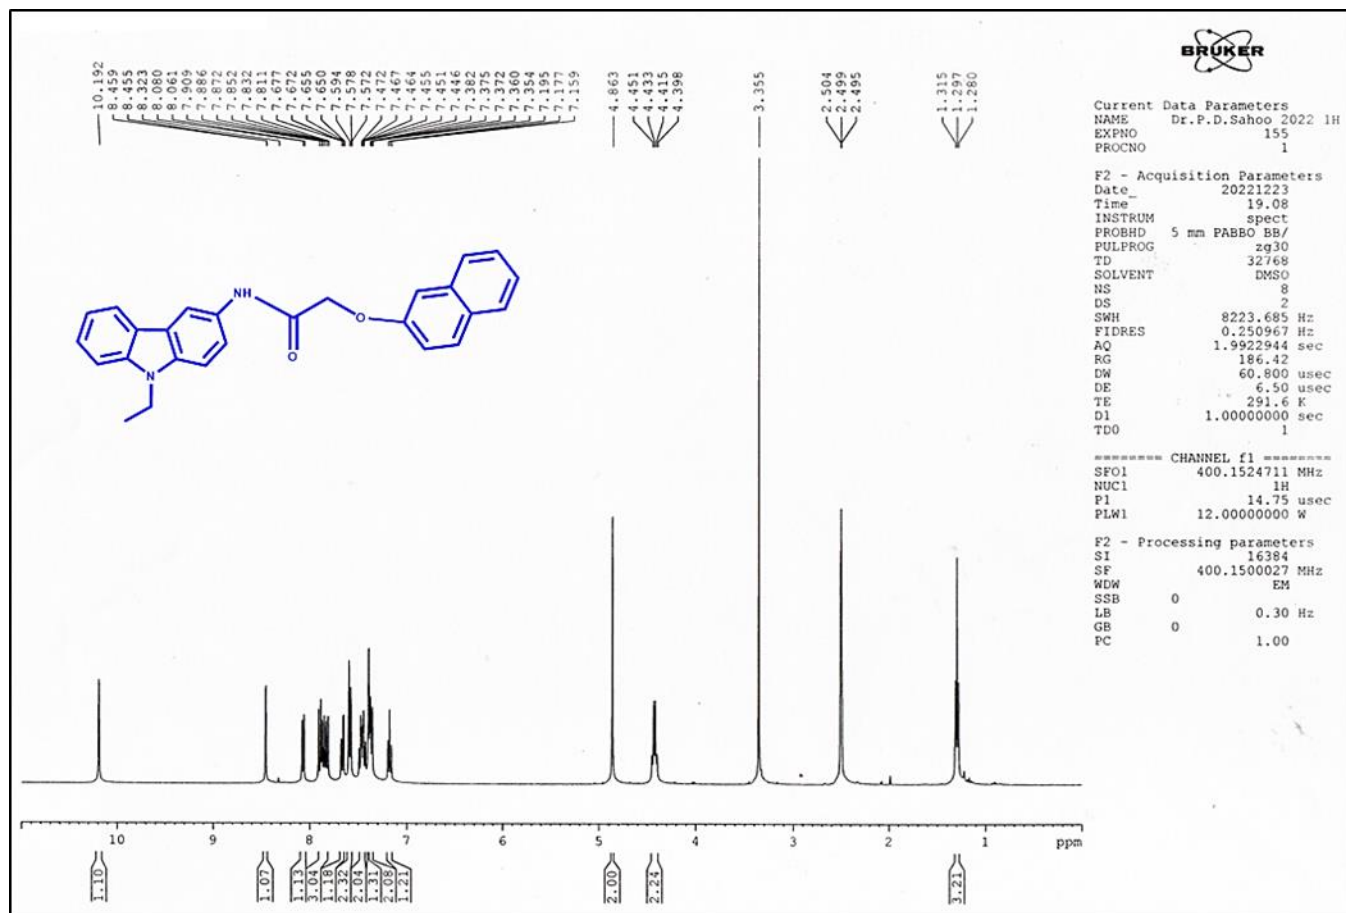

**Figure S12.**  $^1\text{H}$  NMR of C2 in DMSO- $d_6$  (400 MHz).

**$^1\text{H}$  NMR of C3 in DMSO- $d_6$ :**

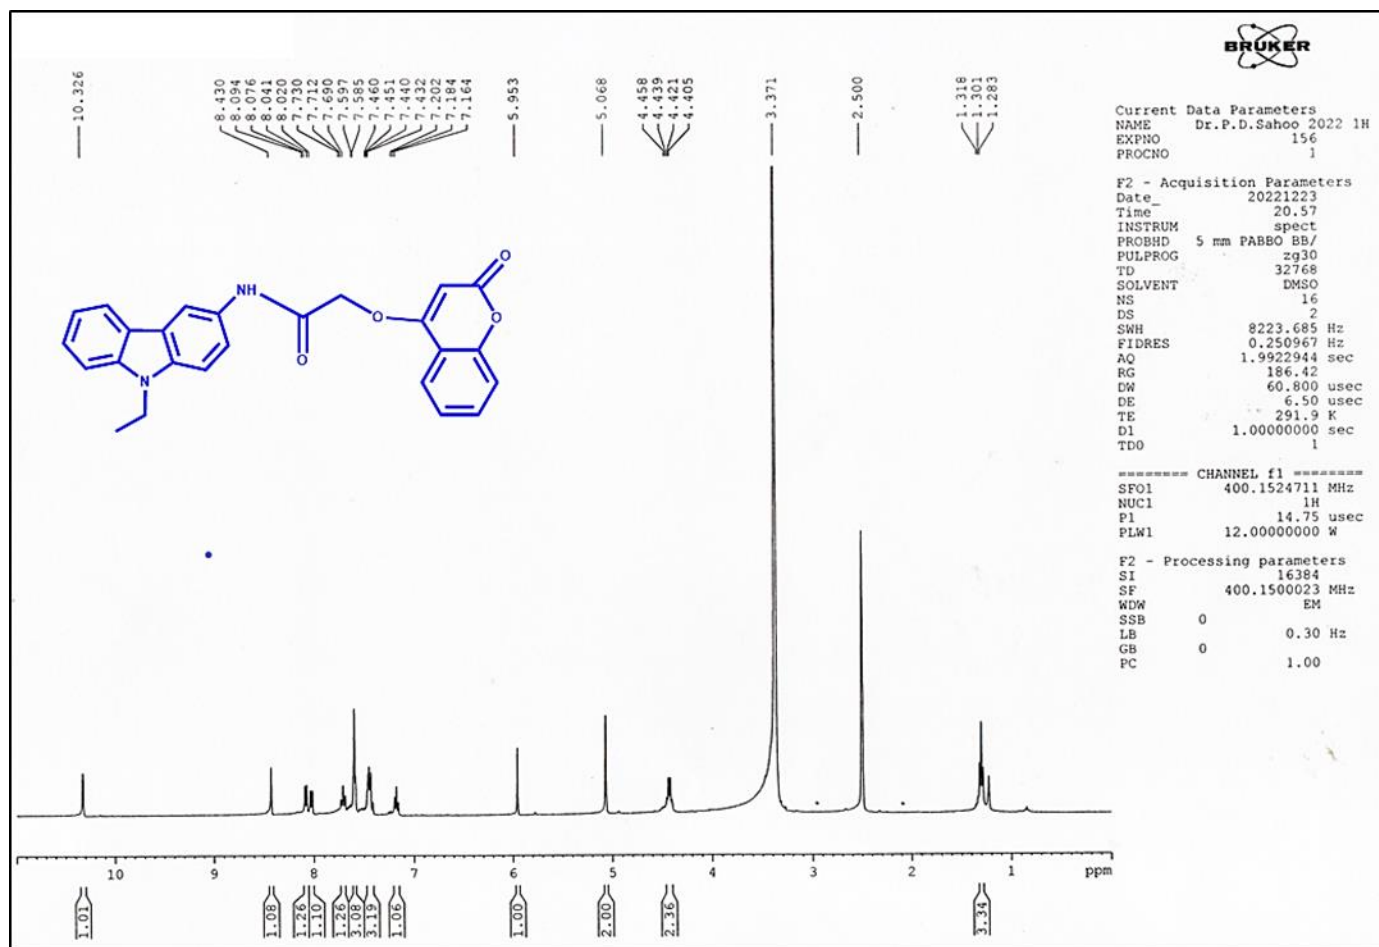

**Figure S13.**  $^1\text{H}$  NMR of C3 in DMSO- $d_6$  (400 MHz).



**11. Table S3. Comparative Fluorescence study of CCF with C1,C2,C3 in presence of N<sub>2</sub>H<sub>4</sub>**

| CHEMOSENSOR                                                                                   | ANALYTE                       | EXICTATION | Maximum EMISSION at |
|-----------------------------------------------------------------------------------------------|-------------------------------|------------|---------------------|
| <p>CCF</p> 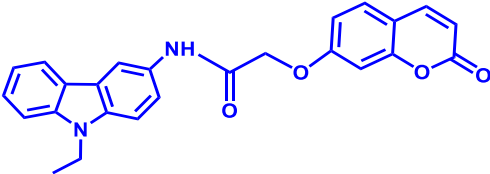 | N <sub>2</sub> H <sub>4</sub> | 332 nm     | 452 nm              |
| <p>C1</p>  | N <sub>2</sub> H <sub>4</sub> | 281 nm     | 372nm,<br>392nm     |
| <p>C2</p>  | N <sub>2</sub> H <sub>4</sub> | 330 nm     | 372nm,<br>392nm     |
| <p>C3</p>  | N <sub>2</sub> H <sub>4</sub> | 360 nm     | 372nm,<br>392nm     |

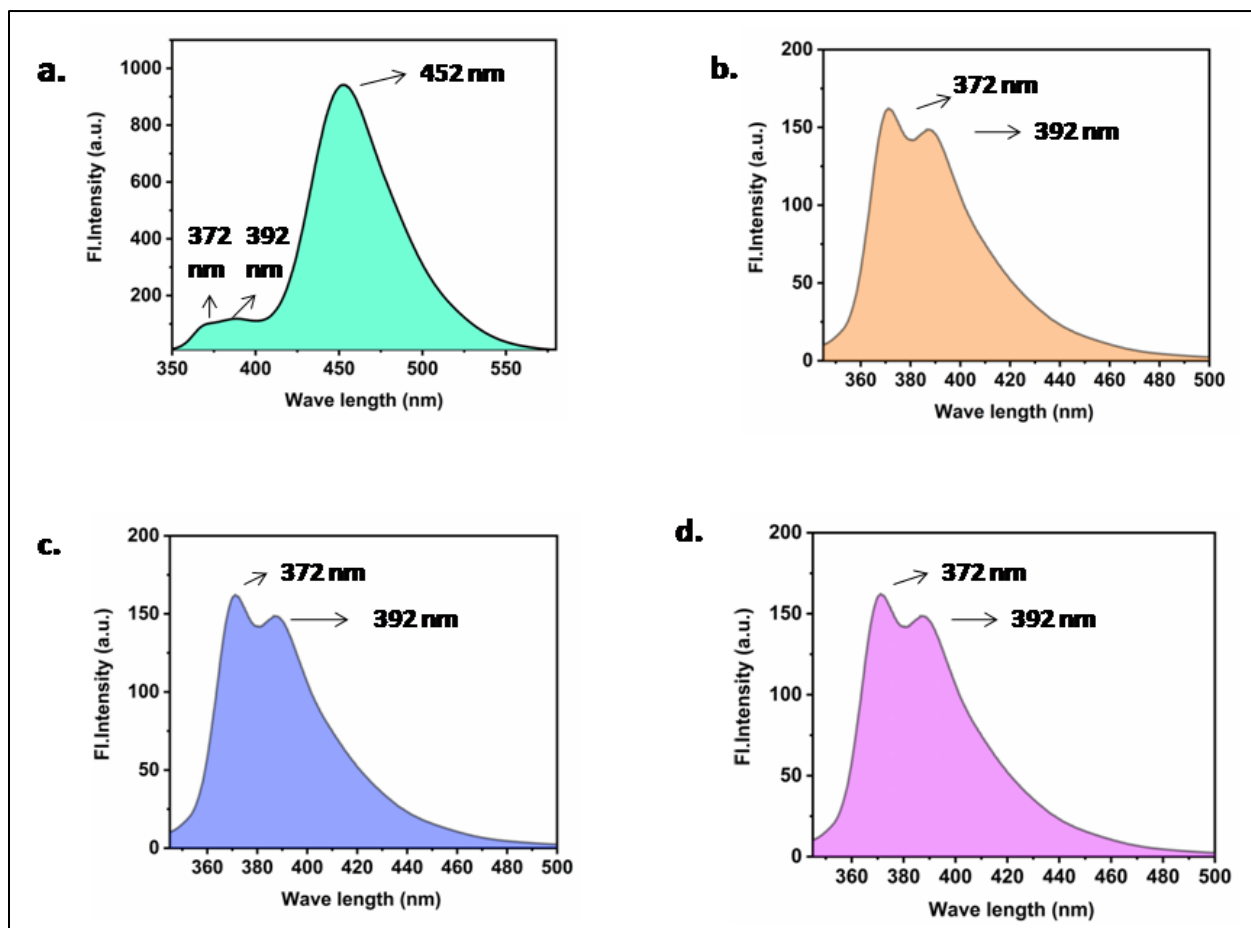

**Figure S14.** Comparative Fluorescence studies of (a) CCF vs  $N_2H_4$  (b) C1 vs  $N_2H_4$  (c) C2 vs  $N_2H_4$  (d) C3 vs  $N_2H_4$  at 452 nm excitation at 332 nm, 280 nm, 330 nm, 360 nm respectively.

## 12. Quantitative analysis of hydrazine in button mushroom

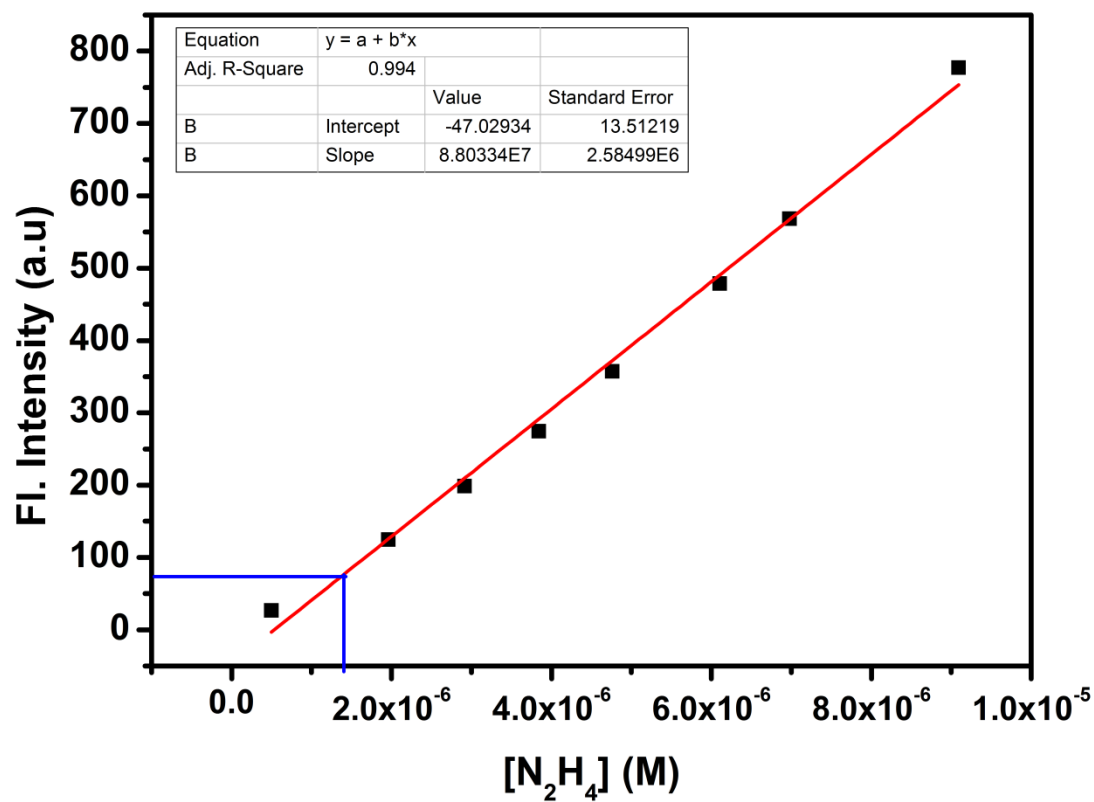

**Figure S15.** Estimation of unknown concentration of hydrazine (blue line) in the gills extract of button mushroom from the standard fluorescence curve.
